# Supplementary material for: Discovery of a novel long noncoding RNA overlapping the LCK gene that regulates prostate cancer cell growth
Source: PubMed Central journal article supplement (PMC6598369; doi:10.1186/s12943-019-1039-6), 2019-06-28
Supplement: 12943_2019_1039_MOESM1_ESM.pdf [file 12943_2019_1039_MOESM1_ESM.pdf]

A.

| <b>HULLK Cloning Primers</b> |                                                                                       |
|------------------------------|---------------------------------------------------------------------------------------|
| HULLK-attB1-Forward          | 5'-GGGGACAAGTTTGTACAAAAAAGCAGGCTTCC<br>TGTTCTTCAAGAACCTGAG-3'                         |
| HULLK-attB1-Start-Forward    | 5'-GGGGACAAGTTTGTACAAAAAAGCAGGCTTCG<br>AAGGAGATAGAACCATGGCTGGTTCTTCAAGAAC<br>CTGAG-3' |
| HULLK-attB2-Reverse          | 5'-GGGGACCACTTTGTACAAGAAAGCTGGGTCTC<br>ATCAACAGACATTTATTGAACTC-3'                     |
| HULLK-attB2-Stop-Reverse     | 5'-GGGGACCACTTTGTACAAGAAAGCTGGGTCTC<br>ATCATCAACAGACATTTATTGAACTC-3'                  |

B.

| <b>5' RACE Primers</b> |                             |
|------------------------|-----------------------------|
| LCK-GSP1-Reverse       | 5'-CTTCGTGTGCCCGTTGTAGTA-3' |
| LCK-GSP2-Reverse       | 5'-CCCGAAGGTCACGATGAATAT-3' |
| <b>3' RACE Primers</b> |                             |
| LCK-GSP1-Forward       | 5'-TACCAACTCATGAGGCTGTGC-3' |

C.

|                              |                              |
|------------------------------|------------------------------|
| LCK Sense-Strand Primer      | 5'-CAGACATTTATTGAACTCCTGA-3' |
| LCK Anti-Sense-Strand Primer | 5'-ATCGTTTTCACTGTCGGT-3'     |

D.

|                        |                                                              |
|------------------------|--------------------------------------------------------------|
| <b>LCK Primers:</b>    |                                                              |
| <b>LCK Exon 2</b>      | (F) 5'-GTGTGAGAACTGCCATTATC-3'_(R) 5'-AGAGCCATTTCCGGATGAG-3' |
| <b>LCK Exon 4</b>      | (F) 5'-CAACCTGGTTATCGCTCT-3'_(R) 5'-CCTTCTCAAAGCCCAGAT-3'    |
| <b>LCK Exon 11</b>     | (F) 5'-ATGGCATTCAATTGAAGAGC-3'_(R) 5'-GTCAGACACCAGAATGTTG-3' |
| <b>LCK Exon 13</b>     | (F) 5'-GGAGCTGTACCAACTCAT-3'_(R) 5'-CAGGTAGTCAAAGGTGGG-3'    |
| <b>LCK 3'UTR</b>       | (F) 5'-ATCCAGAAGTTCCTCAAG-3'_(R) 5'-TTACAACAGTCATCAACAG-3'   |
|                        |                                                              |
| <b>lncRNA Primers:</b> |                                                              |
| <b>DANCR</b>           | (F) 5'-CGGAGGTGGATTCTGTTA-3'_(R) 5'-GTGTAGCAAGTCTGGTGA-3'    |
| <b>NEAT</b>            | (F) 5'-GGTCTGAGGAGTGATGTG-3'_(R) 5'-AAGCGTTGGTCAATGTTG-3'    |
