# Supplementary material for: Discovery of a novel long noncoding RNA overlapping the LCK gene that regulates prostate cancer cell growth
Source: PubMed Central journal article supplement (PMC6598369; doi:10.1186/s12943-019-1039-6), 2019-06-28
Supplement: 12943_2019_1039_MOESM2_ESM.pdf [file 12943_2019_1039_MOESM2_ESM.pdf]

A.

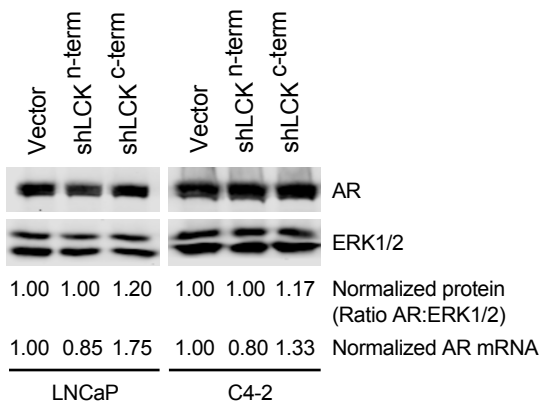

B.

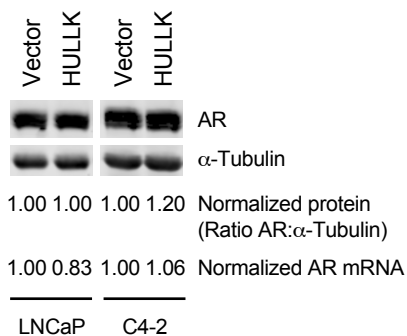

Figure S2
